# Supplementary material
Source: PubMed Central journal article supplement (PMC3964059)
Supplement: 1320924111_pnas.201320924SI.pdf [file 1320924111_pnas.201320924SI.pdf]

# Supporting Information

Ravishankar et al. 10.1073/pnas.1320924111

## SI Materials and Methods

**CCR4 Inhibition.** For experiments in which CCR4 was inhibited, mice were injected i.p. with 1.5  $\mu$ g of CCR4 antagonist C-021 dihydrochloride (EMD Millipore) in 100  $\mu$ L of PBS 12 h before apoptotic cell administration. This amount was equivalent to dosing reported for another CCR4-antagonizing compound (AF399/420/18025) that blocks CCR4 function in vivo (1–4). C-021 in vivo administration has only been reported via oral and s.c. injection to our knowledge with doses ranging from 100 mg/kg (oral) to 3 mg/kg s.c. (5, 6). Our dosage is substantially below these reported amounts; however, it was determined empirically to inhibit Treg accumulation in the splenic follicle (Fig. 2A and B) and thus was used throughout the studies for in vivo inhibition.

**Flow Cytometry.** To assay for apoptotic cell uptake,  $10^7$  PKH26-labeled apoptotic cells in 200  $\mu$ L of PBS was injected i.v. into B6 mice. Two hours after apoptotic cell injection, spleens were collected and injected with 100 U of collagenase (Sigma) in 2 mL PBS and incubated for 30 min at 37 °C in 5 mL PBS containing 400 U/mL of collagenase. From the digest, single-cell suspensions were generated and incubated with MOMA-1 monoclonal antibody (Serotec).

To examine FoxP3<sup>+</sup> Treg positioning in the spleen, B6 mice were injected with  $10^7$  apoptotic syngeneic thymocytes, and 4 h post-injection spleens were collected and stained with anti-CD4 APC (BD Pharmingen) and anti-FoxP3 PE (eBioscience). Intracellular staining for Foxp3 expression was performed with an intracellular staining kit in accordance with the manufacturer's protocol (eBioscience).

For sorting of macrophage and dendritic cell (DC) subsets, CCR4 antagonist (EMD Millipore) pretreated mice were injected with  $10^7$  apoptotic syngeneic thymocytes, and 4–8 h post-injection, spleens were collected and treated with collagenase as described above. From the digest, single-cell suspensions were generated and incubated with MOMA-1 (Serotec),  $\alpha$ -CD8 $\alpha$ ,  $\alpha$ -CD11c,  $\alpha$ -CD103 (BD Pharmingen), and  $\alpha$ -F4/80 (eBioscience). The cells were sorted on a DakoCytomation MoFlo cell sorter into tubes containing RNA protect reagent (Qiagen).

To measure in vivo T-cell proliferation,  $2 \times 10^6$  5- (and 6)-carboxyfluorescein diacetate succinimidyl ester (CFSE)-labeled (Invitrogen) OTII<sup>+</sup>CD45.2<sup>+</sup> T cells were adoptively transferred i.v. into B6.CD45.1 congenic mice via lateral tail-vein injection. Twenty-four hours after OTII transfer, mice were injected with  $10^7$  apoptotic Act-mOVA thymocytes in 200  $\mu$ L of PBS i.v. Three days after apoptotic cell transfer, the spleen was collected and proliferation was assessed via flow cytometry. To visualize the adoptively transferred OTII cells,  $5 \times 10^6$  splenocytes were stained with 2.5  $\mu$ g  $\alpha$ -CD45.2 PE (eBioscience).

For flow cytometric analysis,  $\geq 10^5$  ( $10^6$  in the case of adoptive OTII transfer) events were collected on a LSR II flow cytometer, and all results were analyzed with FlowJo software (TreeStar).

**Semiquantitative PCR.** RNA from sorted cells was purified using RNeasy RNA purification kits (Qiagen), and 250 ng of RNA was reverse-transcribed using a random hexamer cDNA reverse-transcription kit (Clontech). For the PCR, 1  $\mu$ L of cDNA was amplified with primers previously described (7). PCR was done using iQ SYBR Green Super Mix (Bio-Rad) and on an iQ5 real-time PCR detection system (Bio-Rad), and results were analyzed with the accompanying software according to the manufacturer's instructions.

**Chemotaxis Assay.** To assay for chemotaxis, the culture supernatants described in *Materials and Methods* were seeded in the

lower chamber of the provided 96-well plates. The upper chambers were seeded with MACS column-sorted CD4<sup>+</sup>CD25<sup>+</sup> Tregs, CD103<sup>+</sup> CD8<sup>+</sup>, or CD8<sup>neg</sup> DCs in a normal culture medium in the presence or absence of CCR4 antagonist (39 nM C-021 dihydrochloride; EMD Millipore),  $\alpha$ CCL22 blocking antibody (2  $\mu$ g/mL; R&D Systems), or isotype control, and the cells were allowed to migrate for 4 h. The plate was then processed and read at 485 nm (excitation)/530 nm (emission). Migration index was determined as per manufacturer's directions.

**Immunofluorescence and Immunohistochemistry.** To assay for immune deposits, kidneys were embedded in Tissue-Tek OCT compound (Sakura) and snap-frozen. Sections (5  $\mu$ m) were air-dried, fixed with cold acetone, and stained with a 1:200 dilution in PBS plus 1% normal goat serum (NGS) of FITC-conjugated  $\alpha$ -mouse IgG (Sigma-Aldrich).

For immunohistochemistry, spleen was snap-frozen and embedded as described above. For immunofluorescence staining of FoxP3 in the spleen, 5- $\mu$ m sections were fixed for 10 min in 100% methanol followed by extensive PBS washing. The sections were blocked with PBS containing 1% (wt/vol) nonfat milk (Sigma) and 5% (vol/vol) NGS and stained with 1:100 dilution (vol/vol) of rabbit anti-mouse FoxP3 (Abcam) and 1:50 dilution (vol/vol) of hamster anti-mouse CD11c or CD103 (BioLegend) in blocking buffer. After extensive washing with TBS + 0.1% Tween-20, the sections were stained with a 1:1,000 dilution of AF488-labeled goat anti-rabbit IgG (Jackson ImmunoResearch) and AF568-labeled donkey anti-hamster IgG (Jackson ImmunoResearch). Sections were mounted with Prolong Gold anti-fade with DAPI (Invitrogen). In quantifying Treg and DC accumulation, at least 20 follicles were examined per spleen. Fluorescent images were captured using a Zeiss LSM 510 Meta confocal microscope equipped with 405-, 488-, 561-, and 633-nm lasers.

**Skin Transplantation.** Before skin transplantation, female recipient (B6) mice were injected i.p. with 1.5  $\mu$ g of CCR4 antagonist as described above, or B6.CD169<sup>+</sup><sup>DTR</sup> mice were depleted of metallophillic macrophages as described previously (7). One day later, the mice received  $10^7$  apoptotic thymocytes (i.v.). After 1 wk (7 d), tail skin from donor male mice ( $\sim 1$  cm<sup>2</sup>) was placed onto the left thoracic flank region of female mice as previously described (8). Bandages were removed 7 d after engraftment, and allografts were observed for 50 d. Grafts were scored as rejected when ulceration and/or necrosis was evident in >80% of the graft.

**Assays for Autoantibodies.** Briefly, Immulon 2 plates (Dynatech) precoated with BSA were coated with 50  $\mu$ g/mL calf thymus dsDNA (Sigma). To assay for serum autoantibody levels, 50  $\mu$ L of whole blood was collected from tail vein, and the serum was separated using blood collection microtubes according to the manufacturer's directions (Sarstedt). The serum was diluted 1:200 and assayed for autoantigen reactivity against the plates described above by incubation for 2 h at room temperature. Bound IgG was detected using a goat HRP anti-mouse IgG and IgG3 detection antibody (Bethyl Laboratories) and visualized at 450 nm using TMB substrate (KPL) according to the manufacturer's directions.

**Image and Statistical Analysis.** Image analysis was done using National Institutes of Health ImageJ software unless otherwise indicated. Means, SDs, and unpaired Student *t* test results were used to analyze the data. When comparing two groups, a *P*  $\leq$  0.05 was considered to be significant. Allograft survival data were analyzed with Kaplan–Meier survival plots followed by the log-rank test.

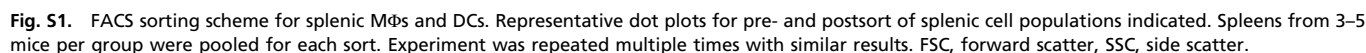





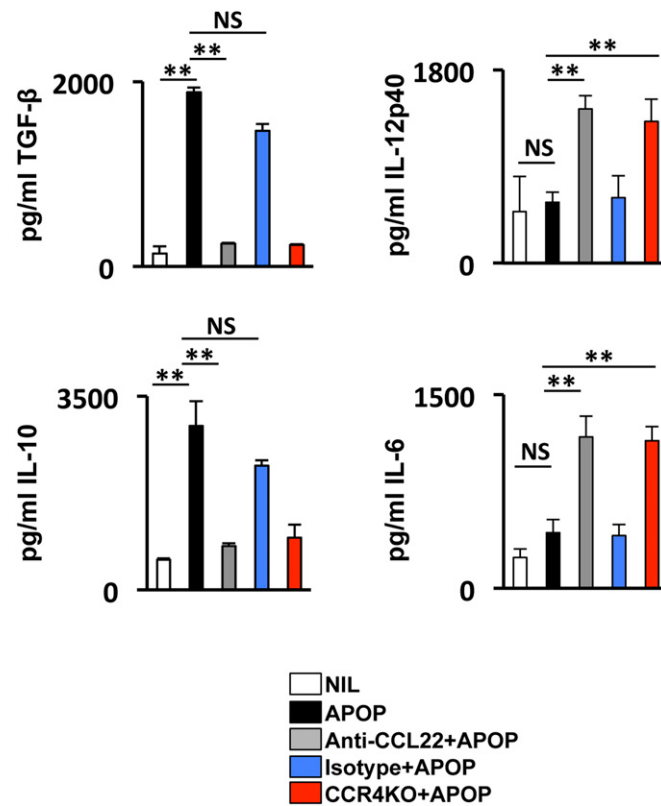

**Fig. S5.** CCR4 function is required for the apoptotic cell-induced regulatory cytokine response in the spleen. CCR4KO or B6 mice were injected as indicated i.p. with CCL22 neutralizing or control IgG antagonist as described in *SI Materials and Methods*. At 4 h later, the mice were challenged with  $10^7$  apoptotic syngeneic thymocytes i.v., and 18 h after apoptotic cell administration spleens were collected and cytokine protein concentrations were determined on whole-spleen lysate by ELISA. Bars represent mean value for five mice  $\pm$  SD.  $**p^{val} < 0.01$  as determined by Student *t* test. Experiments were repeated three times with similar results. NS, not significant.
